# Supplementary material for: CXCL4 Links Inflammation and Fibrosis by Reprogramming Monocyte-Derived Dendritic Cells in vitro
Source: Front Immunol. 2020 Sep 17;11:2149. doi: 10.3389/fimmu.2020.02149 (PMC7527415; doi:10.3389/fimmu.2020.02149)
Supplement: Supplementary file 3 [file Table_2.XLSX]

## Sheet: Primer list for RT-qPCR
Gene	Forward	Reverse
CIITA	CCTGCTGTTCGGGACCTAAA	GGATCCGCACCAGTTTGG
IRF8	CGACGCGCACCATTCA	GCTTGCCCCCATAGTAGAAGCT
HLA DR	CGATCACCAATGTACCTCCA	ACTTGCGGAAAAGGTGGTCT
CD74	ATGCACCTGCTCCAGAATG	TTTCGGTGGAGCGTCAGT
CD83	TCCTGAGCTGCGCCTACAG	AAGTCCACATCTTCGGAGCAA
CD86	GAGTGAACAGACCAAGAAAAGAGAA	AAAAACACGCTGGGCTTCATC
FLT1 / VEGFR1	GAAGCAACAGTCAATGGGCA	GCGTGGTGTGCTTATTTGGA
FN1	CTGGCCGAAAATACATTGTAAA	CCACAGTCGGGTCAGGAG
SPARC	GCGGAAAATCCCTGCCAGAA	GGCAGGAAGAGTCGAAGGTC
αSMA	CCGACCGAATGCAGAAGGA	ACAGAGTATTTGCGCTCCGAA
Sm22a/TAGLN	CTCATGCCATAGGAAGGACC	GTCCGAACCCAGACACAAGT
CHI3L1	GGAGTGGAATGATGTGACGC	CCATCCTCCGACAGACAAGA
MCP1/CCL2	TCTGTGCCTGCTGCTCATAG	GGGCATTGATTGCATCTGGC
MIP1α/CCL3	TGCTCAGAATCATGCAGGTCT	GCAGCAAGTGATGCAGAGAAC
CCL22	CCTGACCCCTCTAACCCATC	GGGTTTAAGCAGGGGAATCG
IL8	GCTCTGTGTGAAGGTGCAGT	CCAGACAGAGCTCTCTTCCA
IL6	GACAGCCACTCACCTCTTCA	CCTCTTTGCTGCTTTCACAC
CXCL10	TGAAATTATTCCTGCAAGCCAA	CAGACATCTCTTCTCACCCTTCTTT
RPL32	AGGGTTCGTAGAAGATTCAAGG	GGA AAC ATT GTG AGC GAT CTC
RPL13A	CCTGGAGGAGAAGAGGAAAGAGA	TTGAGGACCTCTGTGTATTTGTCAA
GAPDH	ATCTTCTTTTGCGTCGCCAG	TTCCCCATGGTGTCTGAGC
LAGLS9	CCGAGGAGAGGAAGACACAC	CCCGTTCACCATCACCTTGA
COL1A1	CCAGAAGAACTGGTACATCAGCA	CGCCATACTCGAACTGGAAT
COL4A2	CCTGAAGGCACAGCTAACCA	TGCTGTTGTCTCGTCTGTCC
